# Supplementary material for: The transition state structure for binding between TAZ1 of CBP and the disordered Hif-1α CAD
Source: PubMed Central journal article supplement (PMC5959852; doi:10.1038/s41598-018-26213-x), 2018-05-18
Supplement: 41598_2018_26213_MOESM1_ESM.pdf [file 41598_2018_26213_MOESM1_ESM.pdf]

# Supplementary Information

## The transition state structure for binding between TAZ1 of CBP and the disordered Hif-1 $\alpha$ CAD

Ida Lindström<sup>1</sup>, Eva Andersson<sup>2</sup>, and Jakob Dogan<sup>1\*</sup>

<sup>1</sup>Department of Biochemistry and Biophysics, Stockholm University, 10691 Stockholm, Sweden

<sup>2</sup>Department of Medical Biochemistry and Microbiology, Uppsala University, 75123 Uppsala, Sweden

\* Corresponding author: e-mail: jakob.dogan@dbb.su.se

Telephone: 46-8-162470

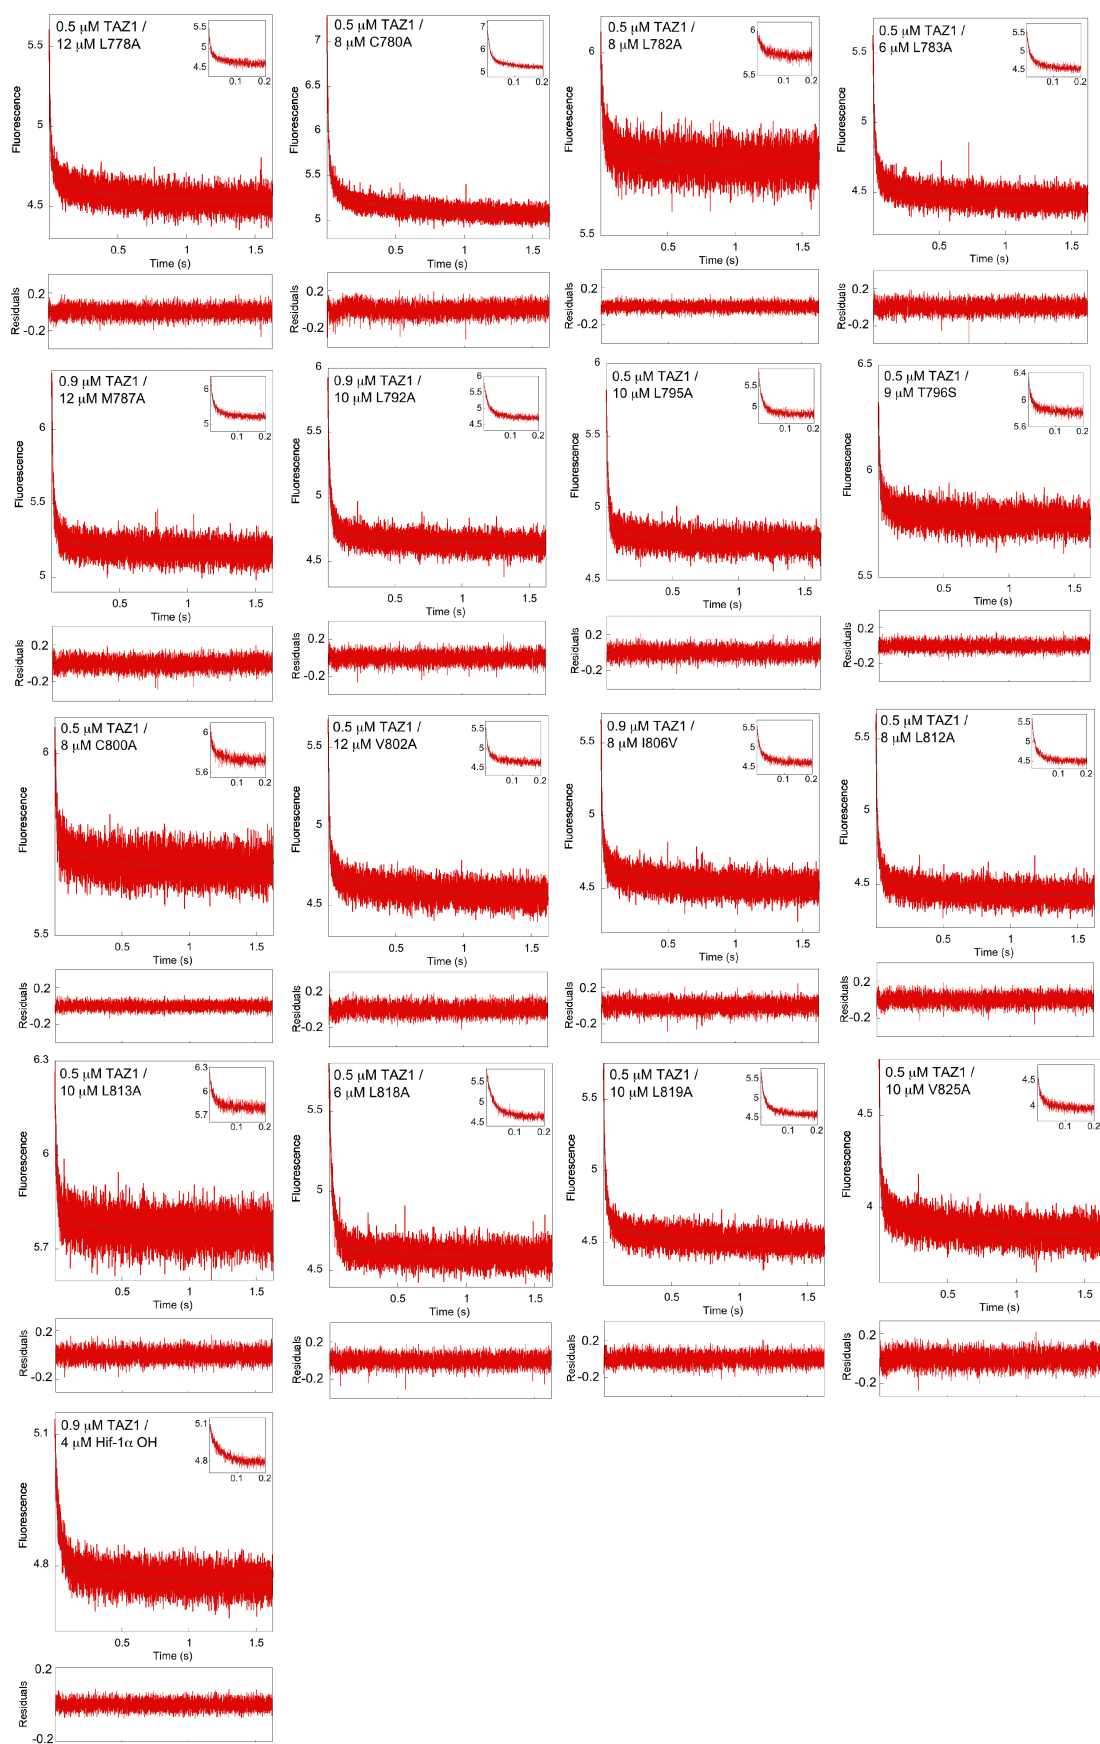

**Figure S1.** Representative stopped-flow binding traces for the TAZ1/Hif-1 $\alpha$  CAD variants. The inset shows a closer view of the fast phase. Data were fitted to a double exponential function.

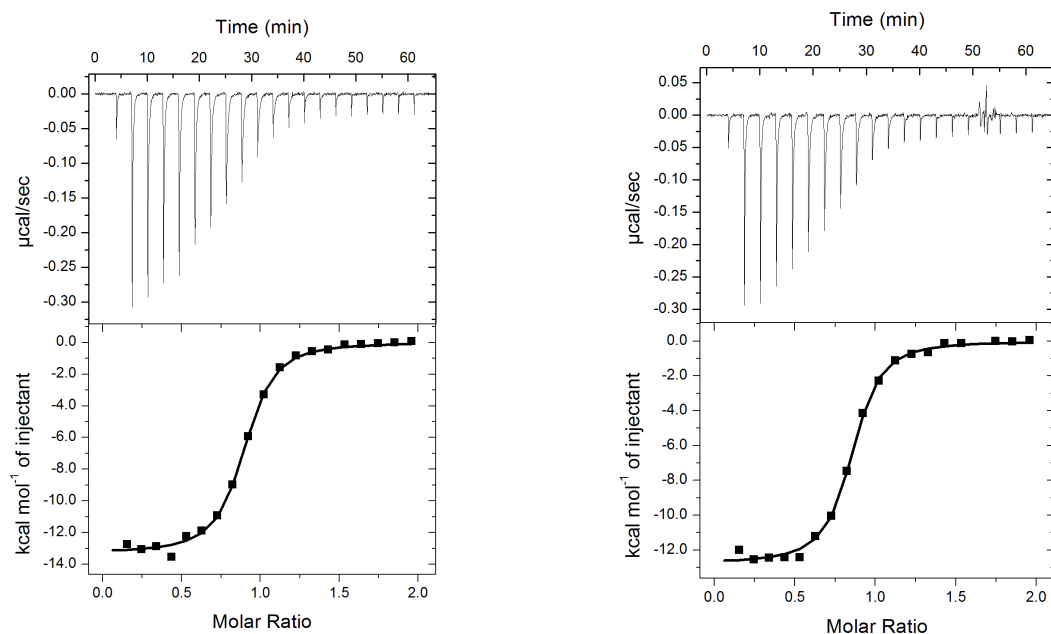

**Figure S2.** ITC titration series for the interaction between TAZ1 and Hif-1 $\alpha$  CAD (L813A), which were performed in duplicate, both of which are shown here. The determined average  $K_d$  is  $0.144 \pm 0.012 \mu\text{M}$ , which is in excellent agreement with the  $K_d$  obtained with the stopped-flow method ( $0.137 \pm 0.009 \mu\text{M}$ ).

**Table S1.**  $k_{\text{obs}}$  for the slow phase for the binding between TAZ1 and Hif1-1 $\alpha$  CAD mutant variants.

| Hif-1 $\alpha$ CAD variant | $k_{\text{obs}}$ (s $^{-1}$ ) slow phase | error |
|----------------------------|------------------------------------------|-------|
| WT                         | 3.33                                     | 0.39  |
| L778A                      | 3.22                                     | 0.23  |
| C780A                      | 3.40                                     | 0.33  |
| L782A                      | 3.29                                     | 0.51  |
| L783A                      | 3.32                                     | 0.29  |
| M787A                      | 3.19                                     | 0.64  |
| L792A                      | 2.86                                     | 0.31  |
| L795A                      | 2.70                                     | 0.52  |
| T796S                      | 3.01                                     | 0.35  |
| C800A                      | 3.24                                     | 1.17  |
| V802A                      | 3.56                                     | 0.57  |
| I806V                      | 3.18                                     | 0.37  |
| L812A                      | 3.59                                     | 0.20  |
| L813A                      | 4.39                                     | 1.24  |
| L818A                      | 3.81                                     | 0.75  |
| L819A                      | 3.62                                     | 0.66  |
| V825A                      | 2.69                                     | 0.14  |
| Hif-1 $\alpha$ OH          | 4.97                                     | 1.71  |
